# Supplementary material
Source: PubMed Central journal article supplement (PMC7322729)
Supplement: NIHMS1590676-supplement-Table_S3.pdf [file NIHMS1590676-supplement-Table_S3.pdf]

**Table S3. Report of the statistics used.**

| <b>Student's t test</b> |                                                                         |                                                              |                                      |                    |
|-------------------------|-------------------------------------------------------------------------|--------------------------------------------------------------|--------------------------------------|--------------------|
|                         | Comparison                                                              | Condition                                                    | Test                                 | t and p values     |
| Fig. 1F                 | Control vs amphetamine                                                  | Fluorescence amplitude (AU)                                  | Two-tailed Student's unpaired t-test | t=-2.48, p=0.017   |
| Fig. 1F                 | Control vs amphetamine                                                  | Rise time (s)                                                | Two-tailed Student's unpaired t-test | t=-3.19, p=0.002   |
| Fig. 1F                 | Control vs amphetamine                                                  | Response width (s)                                           | Two-tailed Student's unpaired t-test | t=-3.19, p=0.026   |
| Fig. 2B                 | Basal vs DA                                                             | Control                                                      | Two-tailed Student's paired t-test   | t=-4.32, p=0.007   |
| Fig. 2B                 | Basal vs DA                                                             | Flupenthixol                                                 | Two-tailed Student's paired t-test   | t=-0.81, p=0.811   |
| Fig. 2B                 | Basal vs DA                                                             | SCH23390                                                     | Two-tailed Student's paired t-test   | t=-0.88, p=0.428   |
| Fig. 2B                 | Basal vs DA                                                             | Sulpiride                                                    | Two-tailed Student's paired t-test   | t=-7.4, p<0.001    |
| Fig. 2B                 | Basal vs DA                                                             | Cocktail                                                     | Two-tailed Student's paired t-test   | t=-5.577, p<0.001  |
| Fig. 2D                 | Basal vs Optostim.                                                      | Control                                                      | Two-tailed Student's paired t-test   | t=-6.22, p<0.001   |
| Fig. 2D                 | Basal vs Optostim.                                                      | Flupenthixol                                                 | Two-tailed Student's paired t-test   | t=0.139, p=0.892   |
| Fig. 2D                 | Basal vs Optostim.                                                      | SCH23390                                                     | Two-tailed Student's paired t-test   | t=-0.337, p=0.75   |
| Fig. 2D                 | Basal vs Optostim.                                                      | Sulpiride                                                    | Two-tailed Student's paired t-test   | t=-7.587, p<0.001  |
| Fig. 2D                 | Basal vs Optostim.                                                      | Cre negative                                                 | Two-tailed Student's paired t-test   | t=0.645, p=0.554   |
| Fig. 4B                 | Basal vs DA                                                             | Calcium event probability: Control                           | Two-tailed Student's paired t-test   | t=-8.836, p<0.001  |
| Fig. 4B                 | Basal vs DA                                                             | Calcium event probability: GDPβS                             | Two-tailed Student's paired t-test   | t=-0.397, p=0.718  |
| Fig. 4B                 | Basal vs DA                                                             | Calcium event probability: IP <sub>3</sub> R2 <sup>-/-</sup> | Two-tailed Student's paired t-test   | t=-0.312, p=0.76   |
| Fig. 4B                 | Basal vs DA                                                             | EPSC amplitude (%): Control                                  | Two-tailed Student's paired t-test   | t=3.731, p=0.007   |
| Fig. 4B                 | Basal vs DA                                                             | EPSC amplitude (%): GDPβS                                    | Two-tailed Student's paired t-test   | t=0.152, p=0.885   |
| Fig. 4B                 | Basal vs DA                                                             | EPSC amplitude (%): IP <sub>3</sub> R2 <sup>-/-</sup>        | Two-tailed Student's paired t-test   | t=0.188, p=0.856   |
| Fig. 4D                 | GFAP-D <sub>1</sub> <sup>WT</sup> vs GFAP-D <sub>1</sub> <sup>-/-</sup> | Baseline                                                     | Two-tailed Student's unpaired t-test | t=3.239, p=0.006   |
| Fig. 4D                 | Basal vs DA                                                             | GFAP-D <sub>1</sub> <sup>WT</sup>                            | Two-tailed Student's paired t-test   | t=-8.725, p<0.001  |
| Fig. 4D                 | Basal vs DA                                                             | GFAP-D <sub>1</sub> <sup>-/-</sup>                           | Two-tailed Student's paired t-test   | t=-1.335, p=0.219  |
| Fig. 4D                 | Basal vs ATP                                                            | GFAP-D <sub>1</sub> <sup>WT</sup>                            | Two-tailed Student's paired t-test   | t=-13.502, p<0.001 |
| Fig. 4D                 | Basal vs ATP                                                            | GFAP-D <sub>1</sub> <sup>-/-</sup>                           | Two-tailed Student's paired t-test   | t=-21.548, p<0.001 |
| Fig. 4E                 | Basal vs DA                                                             | GFAP-D <sub>1</sub> <sup>WT</sup>                            | Two-tailed Student's paired t-test   | t=10.203, p<0.001  |
| Fig. 4E                 | Basal vs DA                                                             | GFAP-D <sub>1</sub> <sup>-/-</sup>                           | Two-tailed Student's paired t-test   | t=1.867, p=0.104   |
| Fig. 5A                 | Basal vs DA                                                             | Control                                                      | Two-tailed Student's paired t-test   | t=-5.679, p=0.002  |

|         |                      |                                    |                                    |                    |
|---------|----------------------|------------------------------------|------------------------------------|--------------------|
| Fig. 5A | Basal vs DA          | CPT                                | Two-tailed Student's paired t-test | t=-4.74, p=0.005   |
| Fig. 5A | Basal vs Optostim.   | Control                            | Two-tailed Student's paired t-test | t=-5.425, p<0.001  |
| Fig. 5A | Basal vs Optostim.   | CPT                                | Two-tailed Student's paired t-test | t=-7.752, p=0.001  |
| Fig. 5B | Basal vs DA          | Control                            | Two-tailed Student's paired t-test | t=10.279, p<0.001  |
| Fig. 5B | Basal vs DA          | CPT                                | Two-tailed Student's paired t-test | t=-0.0938, p=0.929 |
| Fig. 5B | Basal vs Optostim.   | Control                            | Two-tailed Student's paired t-test | t=5.474, p=0.002   |
| Fig. 5B | Basal vs Optostim.   | CPT                                | Two-tailed Student's paired t-test | t=-1.451, p=0.197  |
| Fig. 5E | Basal vs DA          | Control                            | Two-tailed Student's paired t-test | t=6.607, p=0.001   |
| Fig. 5E | Basal vs DA          | GDPβS                              | Two-tailed Student's paired t-test | t=0.26, p=0.802    |
| Fig. 5E | Basal vs DA          | IP <sub>3</sub> R2 <sup>-/-</sup>  | Two-tailed Student's paired t-test | t=1.804, p=0.121   |
| Fig. 5E | Basal vs Ado         | Control                            | Two-tailed Student's paired t-test | t=4.282, p=0.008   |
| Fig. 5E | Basal vs Ado         | GDPβS                              | Two-tailed Student's paired t-test | t=3.804, p=0.007   |
| Fig. 5E | Basal vs Ado         | IP <sub>3</sub> R2 <sup>-/-</sup>  | Two-tailed Student's paired t-test | t=6.753, p<0.001   |
| Fig. 6B | Basal vs CNO         | Control                            | Two-tailed Student's paired t-test | t=-2.965, p=0.041  |
| Fig. 6B | Basal vs CNO         | CPT                                | Two-tailed Student's paired t-test | t=-3.355, p=0.028  |
| Fig. 6B | Basal vs CNO         | mCherry                            | Two-tailed Student's paired t-test | t=-0.474, p=0.656  |
| Fig. 6C | Basal vs CNO         | Control                            | Two-tailed Student's paired t-test | t=3.468, p=0.007   |
| Fig. 6C | Basal vs CNO         | CPT                                | Two-tailed Student's paired t-test | t=-1.244, p=0.260  |
| Fig. 6C | Basal vs CNO         | mCherry                            | Two-tailed Student's paired t-test | t=0.326, p=0.757   |
| Fig. 7D | Basal vs Amphetamine | Control                            | Two-tailed Student's paired t-test | t=-4.752, p=0.005  |
| Fig. 7D | Basal vs Amphetamine | Flupenthixol                       | Two-tailed Student's paired t-test | t=-0.242, p=0.821  |
| Fig. 7D | Basal vs Amphetamine | IP <sub>3</sub> R2 <sup>-/-</sup>  | Two-tailed Student's paired t-test | t=-1.484, p=0.176  |
| Fig. 7D | Basal vs Amphetamine | CPT                                | Two-tailed Student's paired t-test | t=-3.187, p=0.013  |
| Fig. 7D | Basal vs Amphetamine | GDPβS                              | Two-tailed Student's paired t-test | t=-0.0473, p=0.962 |
| Fig. 7D | Basal vs Amphetamine | GFAP-D <sub>1</sub> <sup>WT</sup>  | Two-tailed Student's paired t-test | t=-2.68, p=0.044   |
| Fig. 7D | Basal vs Amphetamine | GFAP-D <sub>1</sub> <sup>-/-</sup> | Two-tailed Student's paired t-test | t=-1.581, p=0.145  |
| Fig. 7G | Basal vs Amphetamine | Control                            | Two-tailed Student's paired t-test | t=5.444, p=0.006   |
| Fig. 7G | Basal vs Amphetamine | Flupenthixol                       | Two-tailed Student's paired t-test | t=0.228, p=0.831   |

|          |                                                                         |                                    |                                      |                    |
|----------|-------------------------------------------------------------------------|------------------------------------|--------------------------------------|--------------------|
| Fig. 7G  | Basal vs Amphetamine                                                    | IP <sub>3</sub> R2 <sup>-/-</sup>  | Two-tailed Student's paired t-test   | t=1.509, p=0.192   |
| Fig. 7G  | Basal vs Amphetamine                                                    | CPT                                | Two-tailed Student's paired t-test   | t=1.036, p=0.34    |
| Fig. 7G  | Basal vs Amphetamine                                                    | GDPβS                              | Two-tailed Student's paired t-test   | t=0.08, p=0.939    |
| Fig. 7G  | Basal vs Amphetamine                                                    | GFAP-D <sub>1</sub> <sup>WT</sup>  | Two-tailed Student's paired t-test   | t=2.824, p=0.022   |
| Fig. 7G  | Basal vs Amphetamine                                                    | GFAP-D <sub>1</sub> <sup>-/-</sup> | Two-tailed Student's paired t-test   | t=-0.031, p=0.977  |
| Fig. 7I  | WT vs IP <sub>3</sub> R2 <sup>-/-</sup>                                 | Saline                             | Two-tailed Student's unpaired t-test | t=-0.796, p=0.432  |
| Fig. 7I  | WT vs IP <sub>3</sub> R2 <sup>-/-</sup>                                 | Amphetamine                        | Two-tailed Student's unpaired t-test | t=4.604, p<0.001   |
| Fig. 7I  | GFAP-D <sub>1</sub> <sup>WT</sup> vs GFAP-D <sub>1</sub> <sup>-/-</sup> | Saline                             | Two-tailed Student's unpaired t-test | t=0.051, p=0.96    |
| Fig. 7I  | GFAP-D <sub>1</sub> <sup>WT</sup> vs GFAP-D <sub>1</sub> <sup>-/-</sup> | Amphetamine                        | Two-tailed Student's unpaired t-test | t=2.395, p=0.038   |
| Fig. S3C | Basal vs DA                                                             | PPR                                | Two-tailed Student's paired t-test   | t=-4.98, p<0.001   |
| Fig. S3D | Basal vs DA                                                             | Control                            | Two-tailed Student's paired t-test   | t=5.23, p=0.003    |
| Fig. S3D | Basal vs DA                                                             | Flupenthixol                       | Two-tailed Student's paired t-test   | t=1.348, p=0.249   |
| Fig. S3D | Basal vs DA                                                             | Control                            | Two-tailed Student's paired t-test   | t=3.808, p=0.005   |
| Fig. S3D | Basal vs DA                                                             | SCH23390                           | Two-tailed Student's paired t-test   | t=0.72, p=0.498    |
| Fig. S3D | Basal vs DA                                                             | Control                            | Two-tailed Student's paired t-test   | t=2.743, p=0.029   |
| Fig. S3D | Basal vs DA                                                             | Sulpiride                          | Two-tailed Student's paired t-test   | t=4.178, p=0.004   |
| Fig. S3G | Basal vs Optostim.                                                      | PPR                                | Two-tailed Student's paired t-test   | t=-4.321, p<0.001  |
| Fig. S3H | Basal vs Optostim.                                                      | Control                            | Two-tailed Student's paired t-test   | t=4.081, p=0.027   |
| Fig. S3H | Basal vs Optostim.                                                      | Flupenthixol                       | Two-tailed Student's paired t-test   | t=0.599, p=0.591   |
| Fig. S3H | Basal vs Optostim.                                                      | Control                            | Two-tailed Student's paired t-test   | t=3.692, p=0.021   |
| Fig. S3H | Basal vs Optostim.                                                      | SCH23390                           | Two-tailed Student's paired t-test   | t=0.46, p=0.665    |
| Fig. S3H | Basal vs Optostim.                                                      | Control                            | Two-tailed Student's paired t-test   | t=4.44, p=0.007    |
| Fig. S3H | Basal vs Optostim.                                                      | Sulpiride                          | Two-tailed Student's paired t-test   | t=2.943, p=0.032   |
| Fig. S3H | Basal vs Optostim.                                                      | Cre negative                       | Two-tailed Student's paired t-test   | t= -0.441, p=0.667 |
| Fig. S4E | SKF vs SKF+SCH                                                          | Δ amplitude (%)                    | Two-tailed Student's unpaired t-test | t=-8.209, p<0.001  |
| Fig. S4F | GFAP-D <sub>1</sub> <sup>WT</sup> vs GFAP-D <sub>1</sub> <sup>-/-</sup> | Δ amplitude (%)                    | Two-tailed Student's unpaired t-test | t=-0.046, p=0.964  |
| Fig. S5D | Basal vs CNO                                                            | PPR                                | Two-tailed Student's paired t-test   | t=-3.264, p=0.009  |

**Table S3. Report of the statistics used.**
