# Supplementary material
Source: PubMed Central journal article supplement (PMC7322729)
Supplement: NIHMS1590676-supplement-Table_S5.pdf [file NIHMS1590676-supplement-Table_S5.pdf]

**Table S5. Data generated during this study.**

| <b>Control</b> | <b>Flupenthixol</b> | <b>GFP</b> | <b>Cre Negative</b> |
|----------------|---------------------|------------|---------------------|
| 53.14775       | 2.667828111         | 2.099232   | 1.8285              |
| 49.38893       | 3.086868985         | 2.144204   | 2.1327              |
| 51.80305       | 1.7503937           | 2.865843   | 3.2794              |
| 46.58431       | 1.522068576         | 2.668221   | 2.2023              |
| 51.69445       | 2.128707987         | 2.659651   | 1.5319              |
| 34.86758       | 1.787914359         | 1.91627    | 2.1175              |
| 38.11447       | 1.910857611         |            | 7.4791              |
| 26.2983        | 2.409698436         |            | 8.3367              |
| 33.96649       | 1.755878489         |            | 4.6553              |
| 29.53085       | 2.234333535         |            | 4.9262              |
| 14.62131       | 2.413795669         |            | 7.2811              |
| 12.46431       | 2.570936734         |            | 4.4119              |
| 12.69833       | 2.200527709         |            | 4.567               |
| 11.91053       | 1.737604382         |            | 10.4148             |
| 14.83358       |                     |            | 9.5706              |
| 3.389124       |                     |            | 8.2926              |
| 29.61016       |                     |            | 4.3059              |
| 25.39001       |                     |            | 1.1583              |
| 21.19334       |                     |            | 1.648               |
|                |                     |            | 1.8625              |
|                |                     |            | 1.2368              |
|                |                     |            | 1.6522              |
|                |                     |            | 1.5573              |

**Table S5. Data generated during this study (continued).**

| <b>Delta F/F</b> |                    | <b>Rise time</b> |                    | <b>Response Width</b> |                    |
|------------------|--------------------|------------------|--------------------|-----------------------|--------------------|
| <b>Control</b>   | <b>Amphetamine</b> | <b>Control</b>   | <b>Amphetamine</b> | <b>Control</b>        | <b>Amphetamine</b> |
| 53.14775         | 166.9391           | 4.295            | 6.533              | 18.787                | 19.899             |
| 49.38893         | 112.3418           | 3.654            | 5.9                | 13.591                | 18.252             |
| 51.80305         | 97.3278            | 4.59             | 6.464              | 18.404                | 18.718             |
| 46.58431         | 93.11432           | 2.924            | 9.691              | 9.377                 | 22.37              |
| 51.69445         | 90.31734           | 4.937            | 6.408              | 19.33                 | 18.697             |
| 34.86758         | 67.16142           | 4.744            | 5.606              | 18.929                | 19.245             |
| 38.11447         | 55.84874           | 4.523            | 3.952              | 19.097                | 17.224             |
| 26.2983          | 37.85231           | 3.303            | 4.49               | 8.133                 | 17.662             |
| 33.96649         | 48.85161           | 4.133            | 3.909              | 11.401                | 17.298             |
| 29.53085         | 68.72813           | 4.737            | 6.391              | 18.638                | 19.461             |
| 14.62131         | 11.90906           | 4.317            | 5.162              | 11.771                | 18.601             |
| 12.46431         | 15.12109           | 3.219            | 6.397              | 14.288                | 13.022             |
| 12.69833         | 8.454579           | 1.96             | 4.436              | 6.202                 | 17.261             |
| 11.91053         | 26.17169           | 1.662            | 4.041              | 4.723                 | 17.633             |
| 14.83358         | 28.76416           | 4.612            | 1.515              | 18.752                | 4.26               |
| 3.389124         | 13.95962           | 5.091            | 5.554              | 16.494                | 8.516              |
| 29.61016         | 38.87875           | 4.312            | 5.747              | 11.651                | 20.076             |
| 25.39001         | 33.35715           | 4.376            | 4.998              | 8.589                 | 18.963             |
| 21.19334         | 28.27916           | 4.164            | 4.706              | 12.812                | 18.752             |

Table S5. Data generated during this study (continued).

| Control  |          | Flupenthixol |          | SCH23390 |          | Sulpiride |          | Cocktail |          |
|----------|----------|--------------|----------|----------|----------|-----------|----------|----------|----------|
| Basal    | DA       | Basal        | DA       | Basal    | DA       | Basal     | DA       | Basal    | DA       |
| 0.2      | 0.8      | 0.4          | 0.2      | 0.090909 | 0.272727 | 0.25      | 0.5      | 0.1875   | 0.4375   |
| 0        | 0.125    | 0.125        | 0.125    | 0.090909 | 0.363636 | 0         | 0.333333 | 0.352941 | 0.470588 |
| 0        | 0.5      | 0            | 0        | 0.133333 | 0.133333 | 0.111111  | 0.333333 | 0.3      | 0.35     |
| 0.125    | 0.25     | 0            | 0.125    | 0.272727 | 0.090909 | 0.111111  | 0.222222 | 0.166667 | 0.555556 |
| 0.181818 | 0.727273 | 0.090909     | 0.181818 | 0.214286 | 0.285714 | 0.090909  | 0.272727 | 0.1      | 0.4      |
| 0.333333 | 0.666667 | 0.111111     | 0.444444 |          |          | 0         | 0.4375   | 0.083333 | 0.333333 |
|          |          |              |          |          |          | 0         | 0.214286 | 0.142857 | 0.47619  |
|          |          |              |          |          |          | 0         | 0.375    | 0.190476 | 0.666667 |
|          |          |              |          |          |          | 0.5       | 0.75     | 0.25     | 0.45     |
|          |          |              |          |          |          | 0.222222  | 0.833333 | 0.157895 | 0.526316 |
|          |          |              |          |          |          | 0.153846  | 0.538462 | 0.125    | 0.875    |
|          |          |              |          |          |          | 0.333333  | 0.888889 |          |          |
|          |          |              |          |          |          | 0.15      | 0.9      |          |          |
|          |          |              |          |          |          | 0.1       | 0.7      |          |          |



**Table S5. Data generated during this study (continued).**

| <b>Depression (%)</b> | <b>Ca2+ event probability</b> |
|-----------------------|-------------------------------|
| 14.61812378           | 0.6                           |
| 29.47550071           | 0.8                           |
| 54.3702251            | 0.5                           |
| 32.2137142            | 0.6                           |
| 7.725715998           | 0.411764706                   |
| 17.99652592           | 0.555555556                   |
| 25.9691465            | 0.75                          |
| 35.13102915           | 0.590909091                   |
| 10.99340247           | 0.4                           |
| 10.97056405           | 0.5                           |
| 26.61090383           | 0.65                          |
| 2.437109745           | 0                             |
| 17.64607371           | 0.25                          |
| 51.39302864           | 0.761904762                   |
| 21.70728713           | 0.4                           |
| 25.41816404           | 0.583333333                   |
| 32.64218623           | 0.666666667                   |
| 16.27091455           | 0.4                           |
| 24.6047814            | 0.6                           |

**Table S5. Data generated during this study (continued).**

| <b>Depression (%)</b> | <b>Ca2+ event probability</b> |
|-----------------------|-------------------------------|
| 0.5                   | 28.76926068                   |
| 0.333333333           | 20.48101461                   |
| 0.3                   | 19.37472815                   |
| 0                     | 3.038467547                   |
| 0.333333333           | 20.87656155                   |
| 0.333333333           | 19.45908114                   |
| 0.5                   | 36.62522297                   |
| 0.285714286           | 32.46555756                   |
| 0.444444444           | 40.47177969                   |
| 0.25                  | 10.17599736                   |
| 0.375                 | 15.63464851                   |

**Table S5. Data generated during this study (continued).**

| Calcium event probability |          |            |          |          | EPSC amplitude (%) |          |          |            |          |          |          |
|---------------------------|----------|------------|----------|----------|--------------------|----------|----------|------------|----------|----------|----------|
| Control                   |          | GDP Beta S |          | IP3R2KO  |                    | Control  |          | GDP Beta S |          | IP3R2KO  |          |
| Basal                     | DA       | Basal      | DA       | Basal    | DA                 | Basal    | DA       | Basal      | DA       | Basal    | DA       |
| 0                         | 0.555556 | 0.125      | 0.375    | 0.222222 | 0.111111           | 88.77518 | 83.19037 | 112.4262   | 104.654  | 93.57559 | 66.29148 |
| 0                         | 0.75     | 0.142857   | 0.142857 | 0        | 0                  | 95.08214 | 98.98622 | 91.51111   | 79.96891 | 104.6821 | 102.6211 |
| 0.1                       | 0.6      | 0.3        | 0.1      | 0        | 0                  | 94.26148 | 56.78748 | 102.3852   | 135.544  | 95.89929 | 97.98475 |
| 0.227273                  | 0.590909 | 0          | 0.1      | 0        | 0.272727           | 98.77379 | 81.78766 | 100.8503   | 123.4387 | 107.5286 | 108.036  |
| 0.2                       | 0.4      |            |          | 0        | 0.4                | 89.2081  | 62.39598 | 92.74057   | 43.7023  | 99.84474 | 97.00925 |
| 0                         | 0.6      |            |          | 0        | 0.1                | 124.9367 | 76.15972 | 117.2511   | 119.0846 | 90.30249 | 116.0245 |
| 0.222222                  | 0.888889 |            |          | 0        | 0                  | 93.8201  | 74.70047 |            |          | 100.101  | 91.83449 |
| 0.076923                  | 0.846154 |            |          | 0.166667 | 0                  | 96.19563 | 69.98151 |            |          | 93.76606 | 98.11352 |
| 0.066667                  | 0.533333 |            |          | 0        | 0                  |          |          |            |          |          |          |
|                           |          |            |          | 0.166667 | 0                  |          |          |            |          |          |          |
|                           |          |            |          | 0        | 0                  |          |          |            |          |          |          |
|                           |          |            |          | 0.166667 | 0.166667           |          |          |            |          |          |          |
|                           |          |            |          | 0        | 0                  |          |          |            |          |          |          |
|                           |          |            |          | 0        | 0                  |          |          |            |          |          |          |
|                           |          |            |          | 0.142857 | 0                  |          |          |            |          |          |          |

**Table S5. Data generated during this study (continued).**

| GFAP D1 WT |          | GFAP D1 -/- |          | GFAP D1 WT |          | GFAP D1 -/- |          |
|------------|----------|-------------|----------|------------|----------|-------------|----------|
| Basal      | DA       | Basal       | DA       | Basal      | ATP      | Basal       | ATP      |
| 0.058824   | 0.529412 | 0.222222    | 0.166667 | 0          | 1        | 0           | 0.478261 |
| 0.142857   | 0.428571 | 0.363636    | 0.181818 | 0.117647   | 0.882353 | 0.069767    | 0.465116 |
| 0.102564   | 0.717949 | 0.266667    | 0.333333 | 0.058824   | 0.941176 | 0.1         | 0.5      |
| 0.179487   | 0.641026 | 0.125       | 0.625    | 0.3        | 0.7      | 0.04878     | 0.536585 |
| 0.117647   | 0.647059 | 0.222222    | 0.111111 | 0          | 1        | 0.185185    | 0.62963  |
|            |          | 0.444444    | 0.333333 | 0          | 1        | 0.078947    | 0.605263 |
|            |          | 0.25        | 0.375    | 0          | 1        |             |          |
|            |          | 0           | 0.333333 | 0          | 1        |             |          |
|            |          | 0           | 0.5      | 0          | 1        |             |          |
|            |          |             |          | 0.133333   | 0.8      |             |          |



**Table S5. Data generated during this study (continued).**

| <b>GFAP D1 WT</b> |           | <b>GFAP D1 -/-</b> |           |
|-------------------|-----------|--------------------|-----------|
| <b>Basal</b>      | <b>DA</b> | <b>Basal</b>       | <b>DA</b> |
| 106.6828          | 85.04125  | 96.81988           | 95.89937  |
| 108.8977          | 74.46239  | 97.61919           | 65.41243  |
| 98.03503          | 76.90264  | 100.5712           | 90.20531  |
| 100.7874          | 64.30788  | 102.8273           | 115.0616  |
| 107.2154          | 90.53338  | 91.11834           | 81.96839  |
| 111.8596          | 76.56349  | 95.67872           | 91.36782  |
| 105.0953          | 81.61427  | 103.3344           | 91.58317  |
| 105.1893          | 75.24182  | 99.28232           | 90.13654  |

**Table S5. Data generated during this study (continued).**

| Control  |          | CPT      |          | Control  |          | CPT      |          |
|----------|----------|----------|----------|----------|----------|----------|----------|
| Basal    | DA       | Basal    | DA       | Basal    | optostim | Basal    | optostim |
| 0        | 0.6      | 0        | 0.4      | 0        | 1        | 0.142857 | 0.5      |
| 0.222222 | 0.888889 | 0        | 1        | 0.3      | 0.7      | 0        | 0.428571 |
| 0.076923 | 0.846154 | 0.307692 | 0.692308 | 0        | 0.25     | 0.375    | 0.75     |
| 0.066667 | 0.533333 | 0        | 0.466667 | 0.066667 | 0.533333 | 0.117647 | 0.352941 |
| 0.235294 | 0.588235 | 0.294118 | 0.588235 | 0.571429 | 0.428571 | 0.214286 | 0.428571 |
| 0.235294 | 0.411765 | 0.117647 | 0.529412 | 0.294118 | 0.411765 |          |          |
|          |          |          |          | 0        | 0.454545 |          |          |
|          |          |          |          | 0        | 0.5      |          |          |
|          |          |          |          | 0.142857 | 0.571429 |          |          |
|          |          |          |          | 0        | 0.666667 |          |          |
|          |          |          |          | 0.125    | 0.375    |          |          |
|          |          |          |          | 0        | 0.5      |          |          |
|          |          |          |          | 0.2      | 0.6      |          |          |

**Table S5. Data generated during this study (continued).**

| <b>Control</b> |           | <b>CPT</b>   |           | <b>Control</b> |                 | <b>CPT</b>   |                 |
|----------------|-----------|--------------|-----------|----------------|-----------------|--------------|-----------------|
| <b>Basal</b>   | <b>DA</b> | <b>Basal</b> | <b>DA</b> | <b>Basal</b>   | <b>optostim</b> | <b>Basal</b> | <b>optostim</b> |
| 103.321        | 79.34477  | 99.2474      | 100.7827  | 97.32349       | 89.28188        | 103.8322     | 127.0774        |
| 115.6014       | 88.73804  | 97.59501     | 89.63879  | 102.3886       | 73.72979        | 99.19295     | 124.4721        |
| 105.6736       | 74.02824  | 95.64175     | 78.49945  | 97.60583       | 79.12344        | 97.453       | 110.5238        |
| 100.1677       | 58.80088  | 102.7911     | 91.94574  | 110.9022       | 85.09452        | 106.9087     | 106.1905        |
| 98.05042       | 68.95881  | 99.68179     | 91.00468  | 97.25588       | 84.9485         | 99.26712     | 118.2122        |
|                |           | 87.87702     | 136.5055  | 79.72649       | 72.04496        | 108.3213     | 87.79015        |
|                |           |              |           | 81.55314       | 63.37478        | 89.47568     | 92.5726         |

**Table S5. Data generated during this study (continued).**

| Control  |          | GDP Beta S |          | IP3R2-/- |          | Control  |          | GDP Beta S |          | IP3R2-/- |          |
|----------|----------|------------|----------|----------|----------|----------|----------|------------|----------|----------|----------|
| Basal    | DA       | Basal      | DA       | Basal    | DA       | Basal    | Ado      | Basal      | Ado      | Basal    | Ado      |
| 117.9468 | 45.42202 | 105.2535   | 87.49669 | 101.0132 | 115.7684 | 105.5133 | 70.72601 | 101.684    | 96.84186 | 100.554  | 55.79598 |
| 117.0449 | 47.99377 | 101.2974   | 109.8268 | 98.03316 | 79.0088  | 120.0567 | 52.60589 | 104.261    | 60.69714 | 91.57067 | 33.82343 |
| 105.0502 | 56.93169 | 105.2651   | 63.75053 | 111.5078 | 104.721  | 106.7227 | 37.14749 | 96.92768   | 83.39698 | 105.8903 | 45.19191 |
| 87.79771 | 61.19096 | 101.3868   | 136.2964 | 102.3217 | 94.8364  | 83.32075 | 65.0866  | 89.42266   | 55.46701 | 103.333  | 12.33046 |
| 108.0697 | 49.75271 | 103.2559   | 114.1959 | 95.5462  | 91.40483 | 97.32644 | 76.26466 | 96.48958   | 53.81499 | 94.50997 | 31.33142 |
| 109.4728 | 77.22716 | 113.5077   | 91.39395 | 102.6763 | 89.68616 | 96.77847 | 68.03507 | 88.72408   | 61.21106 | 100.4462 | 70.76899 |
|          |          | 111.5412   | 115.8862 | 106.0173 | 83.83891 |          |          | 95.51914   | 20.05751 | 92.59321 | 61.0561  |
|          |          | 90.81312   | 96.00754 |          |          |          |          | 100.3078   | 91.72776 |          |          |

**Table S5. Data generated during this study (continued).**

| <b>Control</b> |            | <b>CPT</b>   |            | <b>mCherry</b> |            |
|----------------|------------|--------------|------------|----------------|------------|
| <b>Basal</b>   | <b>CNO</b> | <b>Basal</b> | <b>CNO</b> | <b>Basal</b>   | <b>CNO</b> |
| 0              | 0.285714   | 0.142857     | 0.285714   | 0.2            | 0.2        |
| 0.2            | 0.6        | 0.111111     | 0.666667   | 0.1            | 0.1        |
| 0.25           | 0.375      | 0            | 0.25       | 0              | 0.375      |
| 0.25           | 0.25       | 0            | 0.2        | 0.5            | 0.333333   |
| 0              | 0.2        | 0.285714     | 0.428571   | 0.2            | 0.2        |
|                |            |              |            | 0.125          | 0.125      |

**Table S5. Data generated during this study (continued).**

| <b>Control</b> |            | <b>CPT</b>   |            | <b>mCherry</b> |            |
|----------------|------------|--------------|------------|----------------|------------|
| <b>Basal</b>   | <b>CNO</b> | <b>Basal</b> | <b>CNO</b> | <b>Basal</b>   | <b>CNO</b> |
| 97.76788       | 87.54255   | 97.13926     | 114.7868   | 97.1457        | 96.67023   |
| 109.8818       | 43.74592   | 92.32671     | 86.1277    | 113.9719       | 100.9417   |
| 98.57805       | 93.02759   | 95.64005     | 93.95667   | 104.0873       | 110.6925   |
| 94.56076       | 88.93508   | 101.2651     | 106.6305   | 112.2495       | 86.98993   |
| 98.26294       | 88.50461   | 105.4892     | 119.4072   | 93.8887        | 107.9558   |
| 108.3545       | 16.5133    | 102.7087     | 99.32203   | 105.5306       | 111.9455   |
| 97.9978        | 71.90003   | 99.20436     | 102.9024   |                |            |
| 97.23482       | 75.64903   |              |            |                |            |
| 112.5848       | 77.69519   |              |            |                |            |
| 111.6864       | 69.90516   |              |            |                |            |

Table S5. Data generated during this study (continued).

| Control  |             | Flupenthixol |             | IP3R2 <sup>-/-</sup> |             | CPT      |             | GDP Beta 5 |             | GFAP D1 WT |             | GFAP D1 <sup>-/-</sup> |             |
|----------|-------------|--------------|-------------|----------------------|-------------|----------|-------------|------------|-------------|------------|-------------|------------------------|-------------|
| Basal    | Amphetamine | Basal        | Amphetamine | Basal                | Amphetamine | Basal    | Amphetamine | Basal      | Amphetamine | Basal      | Amphetamine | Basal                  | Amphetamine |
| 0.268286 | 0.5365728   | 0.536573     | 0.643887    | 0.0625               | 0.0625      | 0.446429 | 0.568182    | 0.266667   | 0.233333    | 0.45       | 0.6         | 0.420673               | 0.420673    |
| 0.286172 | 0.7154304   | 0.429258     | 0.429258    | 0                    | 0.083333    | 0.491071 | 0.669643    | 0.291667   | 0.333333    | 0.25       | 1.166667    | 0.778388               | 0.915751    |
| 0.429258 | 0.75120192  | 0.357715     | 0.286172    | 0                    | 0.090909    | 0.382653 | 0.542092    | 0.136364   | 0.318182    | 0.35       | 0.65        | 0.581984               | 0.531377    |
| 0.551903 | 0.9811617   | 0.286172     | 0.381563    | 0                    | 0           | 0.324675 | 0.649351    | 0.090909   | 0.090909    | 0.458333   | 0.666667    | 0.440705               | 0.721154    |
| 0.357715 | 1.00160256  | 0.4          | 0.2         | 0.083333             | 0.083333    | 0.565476 | 0.535714    | 0.264706   | 0.088235    | 0.375      | 0.875       | 0.420673               | 0.540865    |
| 0.686813 | 0.77266484  |              |             | 0.078947             | 0.026316    | 0.223214 | 0.78125     |            |             | 0.6        | 0.625       | 0.423077               | 0.480769    |
|          |             |              |             | 0                    | 0.025       | 0.487013 | 0.649351    |            |             |            |             | 0.5                    | 0.625       |
|          |             |              |             | 0                    | 0           | 0.357143 | 0.982143    |            |             |            |             | 0.722222               | 0.388889    |
|          |             |              |             | 0                    | 0.0625      | 0.384615 | 0.423077    |            |             |            |             | 0.166667               | 0.416667    |
|          |             |              |             |                      |             |          |             |            |             |            |             | 0.1                    | 0.75        |
|          |             |              |             |                      |             |          |             |            |             |            |             | 0.59375                | 0.625       |

**Table S5. Data generated during this study (continued).**

| Control  |             | Flupenthixol |             | IP3R2-/- |             | CPT      |             | GDP Beta S |             | GFAP D1 WT |             | GFAP D1 -/- |             |
|----------|-------------|--------------|-------------|----------|-------------|----------|-------------|------------|-------------|------------|-------------|-------------|-------------|
| Basal    | Amphetamine | Basal        | Amphetamine | Basal    | Amphetamine | Basal    | Amphetamine | Basal      | Amphetamine | Basal      | Amphetamine | Basal       | Amphetamine |
| 91.0327  | 48.5152     | 84.8965      | 80.959      | 87.6861  | 83.7809     | 96.639   | 79.9867     | 98.62938   | 80.28075    | 78.97245   | 71.59714    | 98.1874     | 54.46558    |
| 97.2178  | 72.599      | 95.1718      | 90.548      | 86.7477  | 91.3217     | 98.6555  | 78.2654     | 94.67367   | 97.3015     | 127.8581   | 99.30721    | 117.8756    | 96.18133    |
| 109.8074 | 73.2314     | 111.7173     | 104.2648    | 119.7777 | 92.4428     | 84.3447  | 92.6572     |            |             | 92.21116   | 14.17229    | 99.0596     | 133.2104    |
| 95.234   | 36.6176     | 97.6513      | 99.4556     | 103.5341 | 106.4047    | 99.0358  | 98.06       | 100.2658   | 115.1305    | 93.3385    | 28.16996    | 110.2428    | 65.89503    |
| 107.1831 | 32.839      | 93.5308      | 104.0942    | 95.1931  | 91.3722     | 100.2292 | 117.2422    | 105.2615   | 115.5485    | 95.05407   | 88.86671    | 73.08353    | 152.4665    |
|          |             |              |             | 94.4713  | 74.6118     | 93.4493  | 75.401      | 100.9429   | 88.3058     | 127.3423   | 154.7634    |             |             |
|          |             |              |             |          |             | 82.1446  | 73.6339     | 110.2376   | 110.9152    | 142.4925   | 42.94668    |             |             |
|          |             |              |             |          |             |          |             |            |             | 112.2577   | 67.27237    |             |             |
|          |             |              |             |          |             |          |             |            |             | 108.3097   | 75.58816    |             |             |



**Table S5. Data generated during this study (continued).**

| <b>WT</b>     |                    | <b>IP3R2-/-</b> |                    | <b>GFAP D1 WT</b> |                    | <b>GFAP D1 -/-</b> |                    |
|---------------|--------------------|-----------------|--------------------|-------------------|--------------------|--------------------|--------------------|
| <b>Saline</b> | <b>Amphetamine</b> | <b>Saline</b>   | <b>Amphetamine</b> | <b>Saline</b>     | <b>Amphetamine</b> | <b>Saline</b>      | <b>Amphetamine</b> |
| 55.8505       | 448.649            | 54.1855         | 364.68             | 95.7295           | 220.675            | 59.252             | 215.678            |
| 47.2705       | 538.192            | 45.552          | 475.762            | 49.099            | 378.441            | 89.246             | 374.633            |
| 57.942        | 541.32             | 52.75           | 153.538            | 40.732            | 380.196            | 70.9715            | 306.976            |
| 38.5405       | 526.715            | 32.514          | 129.415            | 89.755            | 581.995            | 47.1595            | 375.394            |
| 50.809        | 547.253            | 54.761          | 278.792            | 52.456            | 641.769            | 60.524             | 144.167            |
| 35.883        | 199.354            | 68.045          | 65.79              | 92.398            | 552.761            | 89.188             | 262.073            |
| 73.7675       | 236.22             | 89.06           | 71.132             |                   |                    |                    |                    |
| 27.369        | 301.989            | 48.747          | 162.727            |                   |                    |                    |                    |
| 30.7645       | 523.525            | 24.8965         | 113.142            |                   |                    |                    |                    |
| 36.8275       | 506.788            | 66.6705         | 81.444             |                   |                    |                    |                    |
| 39.308        | 535.573            | 29.556          | 273.436            |                   |                    |                    |                    |
| 11.0865       | 482.98             | 44.34           | 440.421            |                   |                    |                    |                    |
| 36.2645       | 493.641            | 19.151          | 442.802            |                   |                    |                    |                    |
| 33.8285       | 516.488            | 52.799          | 233.033            |                   |                    |                    |                    |
| 65.248        | 552.489            | 34.713          | 181.567            |                   |                    |                    |                    |
| 41.43         | 465.081            | 39.526          | 477.154            |                   |                    |                    |                    |

**Table S5. Data generated during this study (continued).**

**PPR**

| <b>Basal</b> | <b>DA</b> |
|--------------|-----------|
| 0.827019     | 1.305886  |
| 0.727926     | 1.134316  |
| 1.077141     | 1.19785   |
| 0.898342     | 1.320826  |
| 1.288747     | 1.448357  |
| 1.221299     | 1.292144  |
| 1.084328     | 1.519335  |
| 1.044243     | 1.157295  |
| 1.045655     | 1.346037  |
| 1.319643     | 1.035434  |
| 0.884268     | 1.290911  |
| 1.406836     | 2.087199  |
| 1.172719     | 1.502968  |
| 1.135525     | 1.648872  |
| 1.425705     | 1.771223  |

**Table S5. Data generated during this study (continued).**

| Control  |          | Flupenthixol |          | Control  |          | SCH 23390 |          | Control  |          | Sulpiride |          |
|----------|----------|--------------|----------|----------|----------|-----------|----------|----------|----------|-----------|----------|
| Basal    | DA       | Basal        | DA       | Basal    | DA       | Basal     | DA       | Basal    | DA       | Basal     | DA       |
| 119.1514 | 79.02314 | 100.2812     | 82.8999  | 100.7593 | 89.21174 | 107.4718  | 85.62986 | 83.19984 | 58.97581 | 87.03761  | 76.62556 |
| 100.0475 | 74.88247 | 108.0238     | 91.85354 | 95.9491  | 36.24758 | 106.4735  | 79.70456 | 114.2778 | 47.32199 | 97.08973  | 83.82918 |
| 96.40207 | 77.20193 | 117.8146     | 126.2928 | 111.2329 | 99.88655 | 92.38937  | 104.7582 | 102.4862 | 102.535  | 91.07503  | 79.6681  |
| 94.65293 | 61.21143 | 91.53386     | 97.05616 | 92.12442 | 85.27266 | 99.67893  | 107.6867 | 93.57801 | 109.2147 | 71.03329  | 71.30417 |
| 73.3883  | 33.51489 | 120.0665     | 91.60165 | 94.73566 | 73.94991 | 78.25075  | 90.36721 | 90.66655 | 55.55619 | 92.26849  | 70.65437 |
| 89.71623 | 82.42344 |              |          | 105.0992 | 58.3073  | 101.6597  | 85.33279 | 120.4888 | 87.31202 | 100.4122  | 77.45865 |
|          |          |              |          | 90.86116 | 79.82136 | 98.00596  | 98.5692  | 88.21714 | 74.87293 | 115.1088  | 75.35873 |
|          |          |              |          | 94.896   | 73.5591  |           |          | 108.0658 | 64.04697 | 97.44521  | 66.70343 |
|          |          |              |          | 92.83863 | 75.39522 |           |          |          |          |           |          |

**Table S5. Data generated during this study (continued).**

**PPR**

| <b>Basal</b> | <b>Optostim.</b> |
|--------------|------------------|
| 1.430563     | 2.064296         |
| 0.988661     | 1.278554         |
| 1.206182     | 2.161098         |
| 1.190766     | 1.393161         |
| 0.80536      | 0.994798         |
| 0.956659     | 1.096569         |
| 1.128978     | 1.259884         |
| 0.861455     | 0.952731         |
| 1.227877     | 1.487389         |
| 1.130269     | 1.21656          |
| 0.506169     | 0.609392         |
| 1.108004     | 1.61091          |
| 0.844278     | 1.133829         |
| 1.461306     | 1.614615         |

**Table S5. Data generated during this study (continued).**

| Control  |           | Flupenthixol |           | Control  |           | SCH 23390 |           | Control  |           | Sulpiride |           | Cre negative |           |
|----------|-----------|--------------|-----------|----------|-----------|-----------|-----------|----------|-----------|-----------|-----------|--------------|-----------|
| Basal    | Optostim. | Basal        | Optostim. | Basal    | Optostim. | Basal     | Optostim. | Basal    | Optostim. | Basal     | Optostim. | Basal        | Optostim. |
| 112.4507 | 72.02403  | 99.69447     | 107.9047  | 88.96651 | 79.52762  | 101.806   | 94.03843  | 111.3721 | 69.38784  | 87.46336  | 78.19816  | 100.295      | 86.53996  |
| 96.82199 | 82.80856  | 108.1819     | 97.62601  | 84.40978 | 69.4737   | 98.85531  | 102.9493  | 97.99998 | 53.59177  | 95.77654  | 97.8289   | 94.65033     | 93.17604  |
| 103.2959 | 83.69163  | 101.9897     | 105.8229  | 115.5056 | 65.20099  | 103.3508  | 77.42823  | 94.84919 | 75.07005  | 98.72135  | 83.2615   | 105.8993     | 122.3132  |
| 99.72943 | 79.35344  | 105.7498     | 91.00054  | 95.91514 | 70.61565  | 118.1401  | 102.7438  | 97.23144 | 69.38241  | 101.2688  | 71.08504  | 99.15153     | 104.088   |
|          |           |              |           | 103.4814 | 71.23074  | 99.1807   | 114.7358  | 116.3066 | 67.53444  | 110.0888  | 59.52822  | 100          | 112.0014  |
|          |           |              |           |          |           | 107.7766  | 119.0358  | 97.10237 | 93.01485  | 97.84574  | 65.81466  | 98.67446     | 92.77224  |

**Table S5. Data generated during this study (continued).**

**$\Delta$  Amplitude**

| <b>SKF</b> | <b>SKF + SCH</b> |
|------------|------------------|
| -26.4838   | -5.76E-04        |
| -23.7896   | 2.577551         |
| -15.8114   | 4.452819         |
| -16.7677   | 1.484178         |

**Table S5. Data generated during this study (continued).**

**Δ Amplitude**

| <b>GFAP-D1-WT</b> | <b>GFAP-D1-/-</b> |
|-------------------|-------------------|
| 3.942024087       | -16.4852211       |
| -0.032400109      | 4.02123118        |
| -22.47912502      | -1.79851263       |
| 3.682490459       | -21.9797067       |
| -1.533473726      | 1.47630868        |
| -23.78956163      | -24.7006982       |
| -21.6015225       | -3.97085063       |
| -26.4837696       | -32.0355033       |
| -15.81135109      | -16.7677438       |
| -13.19597013      | -2.49203595       |
| 4.105910028       | 3.20318033        |
| -0.353764102      | -16.7372145       |
| -22.50166136      |                   |

**Table S5. Data generated during this study (continued).**

**PPR**

| <b>Basal</b> | <b>CON</b> |
|--------------|------------|
| 1.209268     | 1.220438   |
| 1.519933     | 2.266671   |
| 0.850332     | 1.13874    |
| 1.569293     | 1.733554   |
| 0.938139     | 1.064037   |
| 0.487327     | 1.806149   |
| 1.083496     | 1.683109   |
| 1.123366     | 1.71125    |
| 1.334996     | 1.259686   |
| 1.493277     | 2.037717   |
